# Supplementary material for: A biomimetic microfluidic chip based on the bubble filtration mechanism of stomatal pore membranes
Source: Royal Society of Chemistry journal article supplement (doi:10.1039/d4nj02456g), 2024-01-01
Supplement: d4nj02456g2.pdf [file d4nj02456g2.pdf]

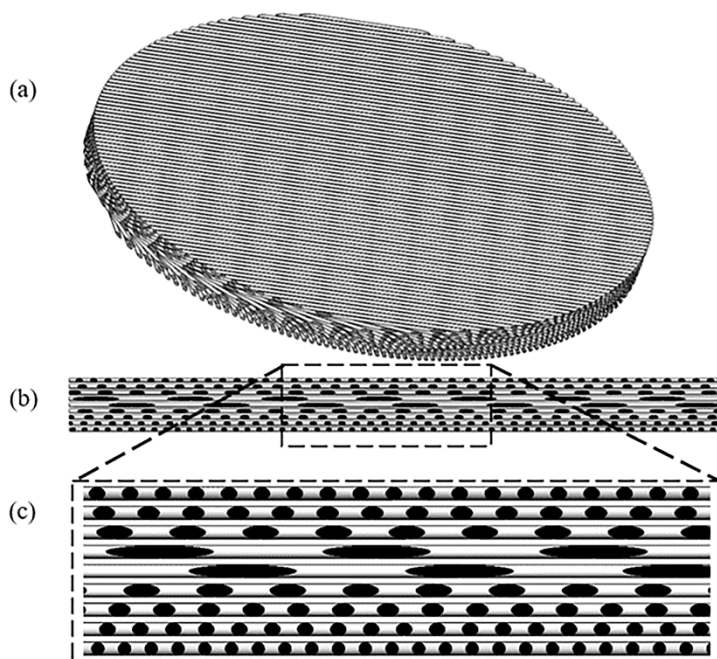

Fig. S1 Three-dimensional structure of pit membrane.

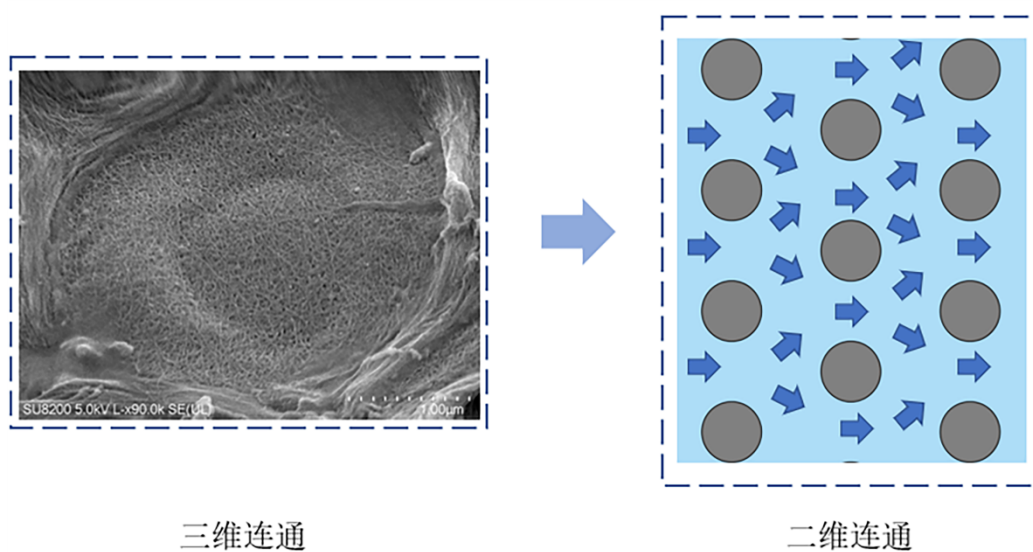

Fig. S2 Simplified model.

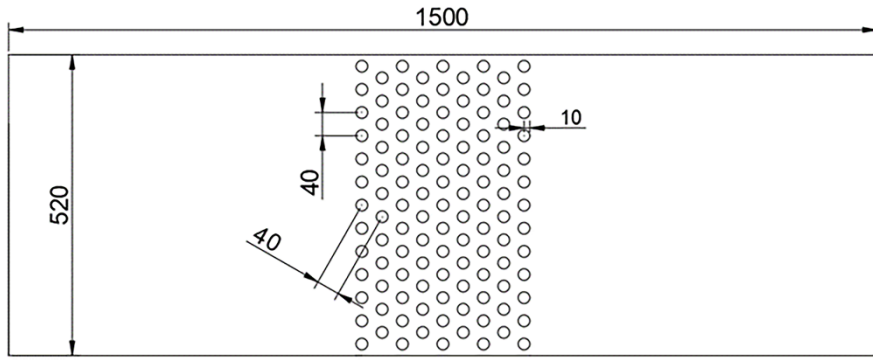

Fig. S3 Schematic diagram of the calculation model structure. (unit: nm)

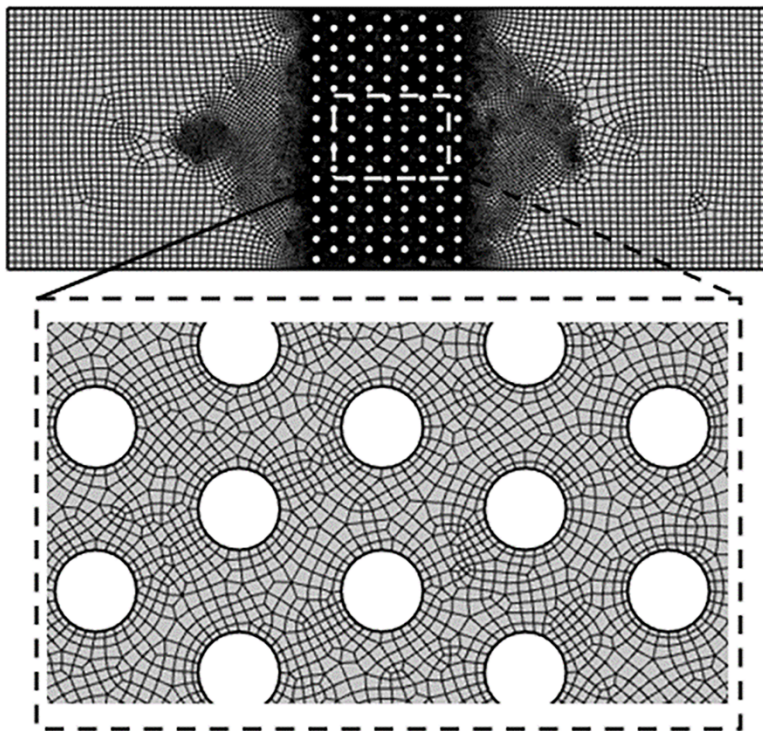

Fig. S4 Schematic diagram of meshing of computational model.

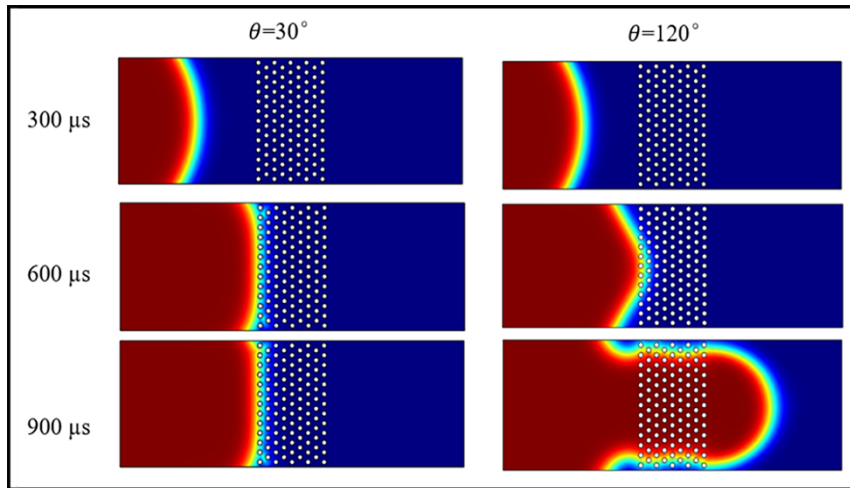

Fig. S5 Effect of surface wettability on bubble filtration.

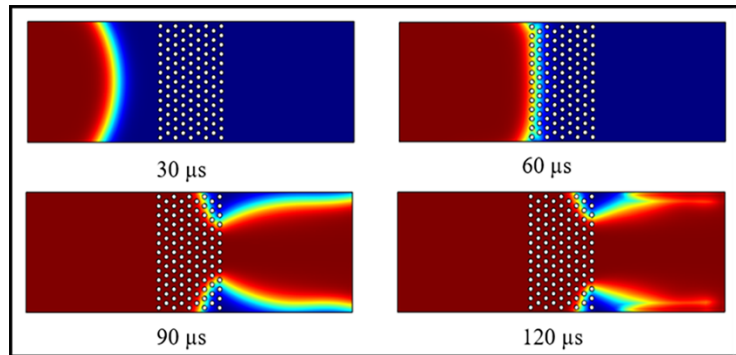

Fig. S6 Flow process of gas phase under 6.4MPa pressure.

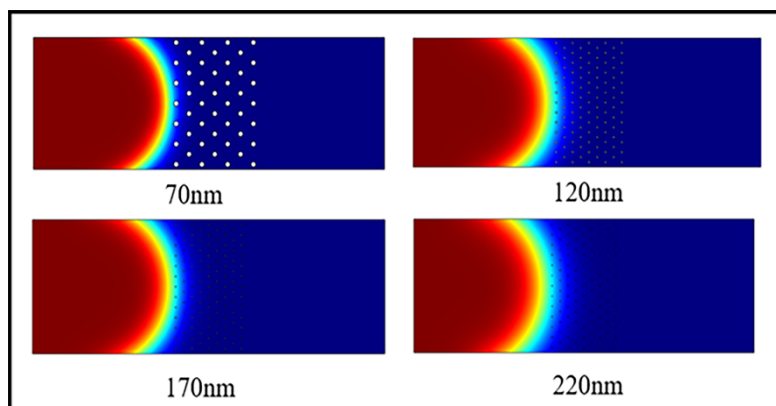

Fig. S7. Simulation results of models with pore sizes of 70nm, 120nm, 170nm and 220nm.

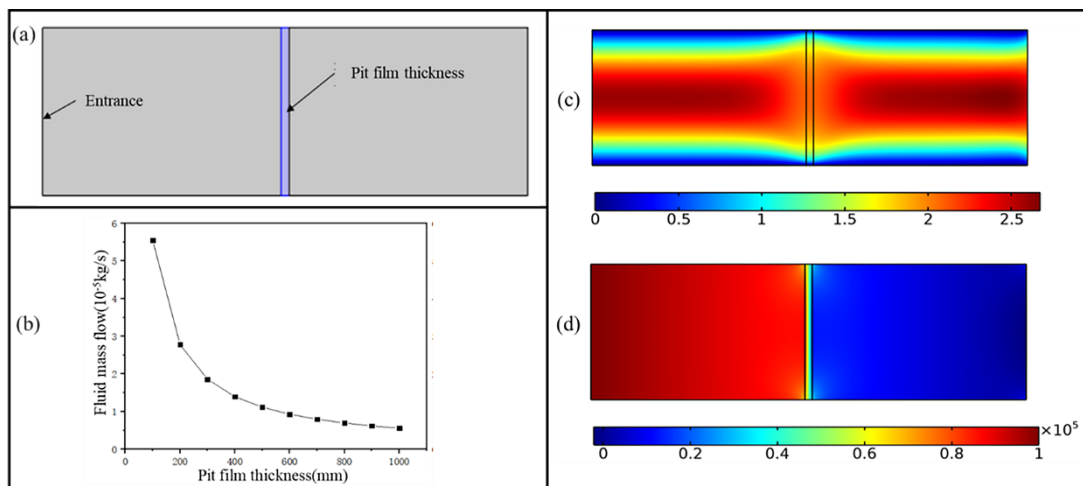

**Fig. S8 Simulation results of the influence of pitted film thickness on fluid flow.** (a) Division of the simulation model of the influence of pitted film thickness on fluid flow. (b) Relationship between pitted film thickness and fluid mass flow. (c) Effect of pitted film thickness on fluid flow simulation velocity cloud map, m/s. (d) Effect of pitted film thickness on fluid flow simulation pressure cloud map, Pa.

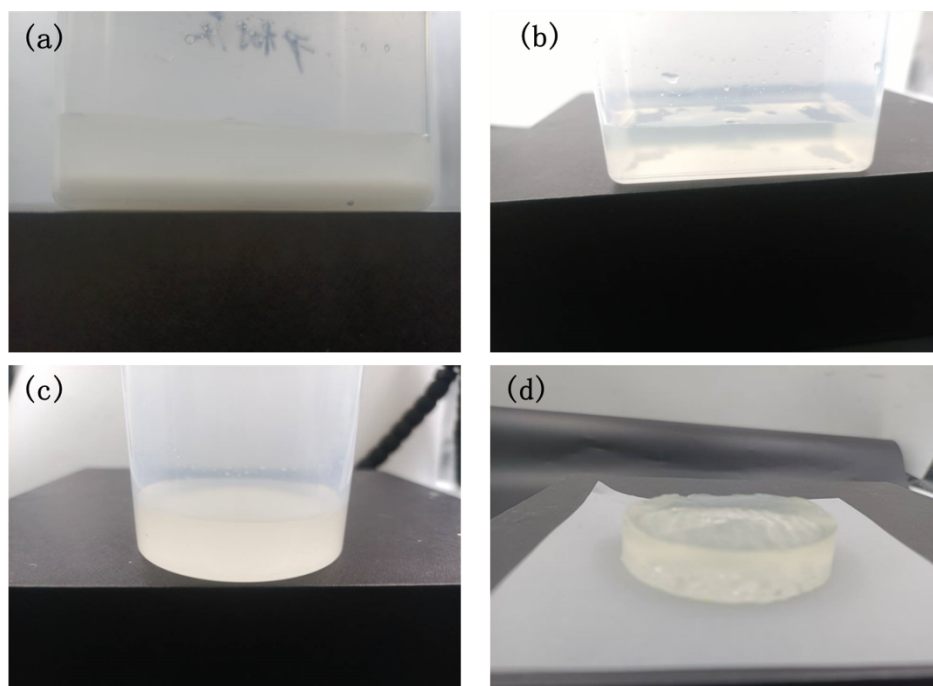

**Fig.S9 Fabrication of cellulose/PVA hydrogels.**

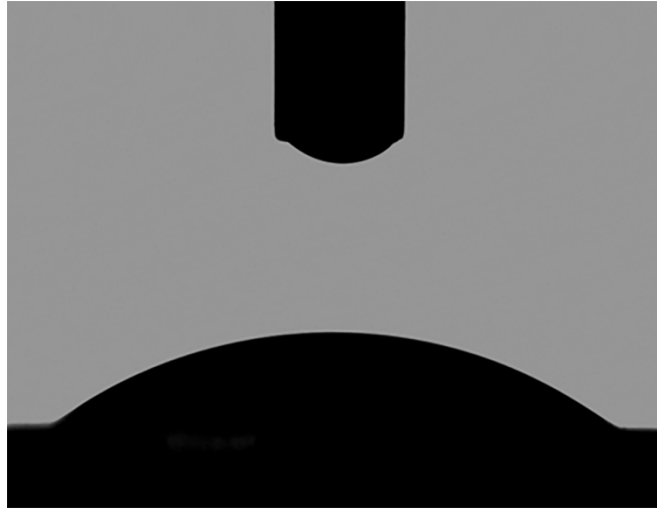

**Fig.S10** Contact angle of cellulose/PVA hydrogel.

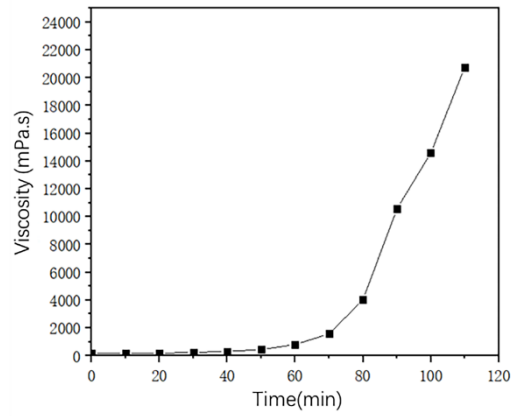

**Fig.S11** Variation of gel solution viscosity with time.

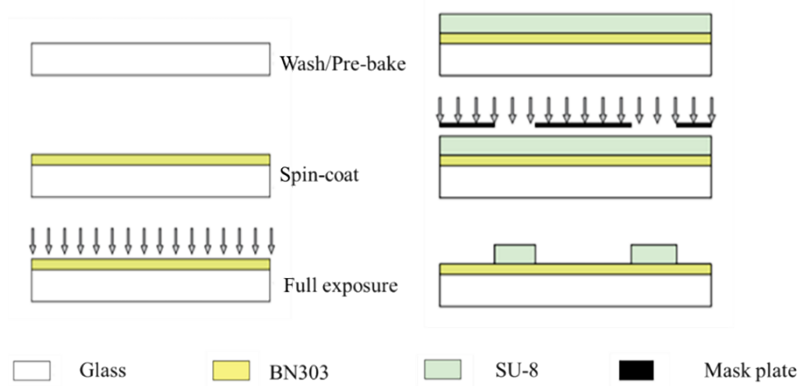

**Fig.S12** SU-8 mold making process.
